# Supplementary material for: Multiple actuation microvalves in wax microfluidics
Source: Royal Society of Chemistry journal article supplement (doi:10.1039/c6lc00800c), 2016-01-01
Supplement: c6lc00800c1.pdf [file c6lc00800c1.pdf]

## **Multiple actuation microvalves in wax microfluidics**

María Díaz-González\*, César Fernández Sánchez and Antoni Baldi

Instituto de Microelectrónica de Barcelona, IMB-CNM (CSIC), SPAIN

### **Electronic Supporting Information (ESI)**

#### *Supplementary Materials Contents:*

Figure S1. Wax valve structures.

Table S1. Heater designs for valve actuation.

Table S2. Optimized valve actuator parameters.

#### *Additional Supplementary Material:*

Movie S1. Reversible actuation of the wax valve in air.

Movie S2. Reversible actuation of the wax valve in water.

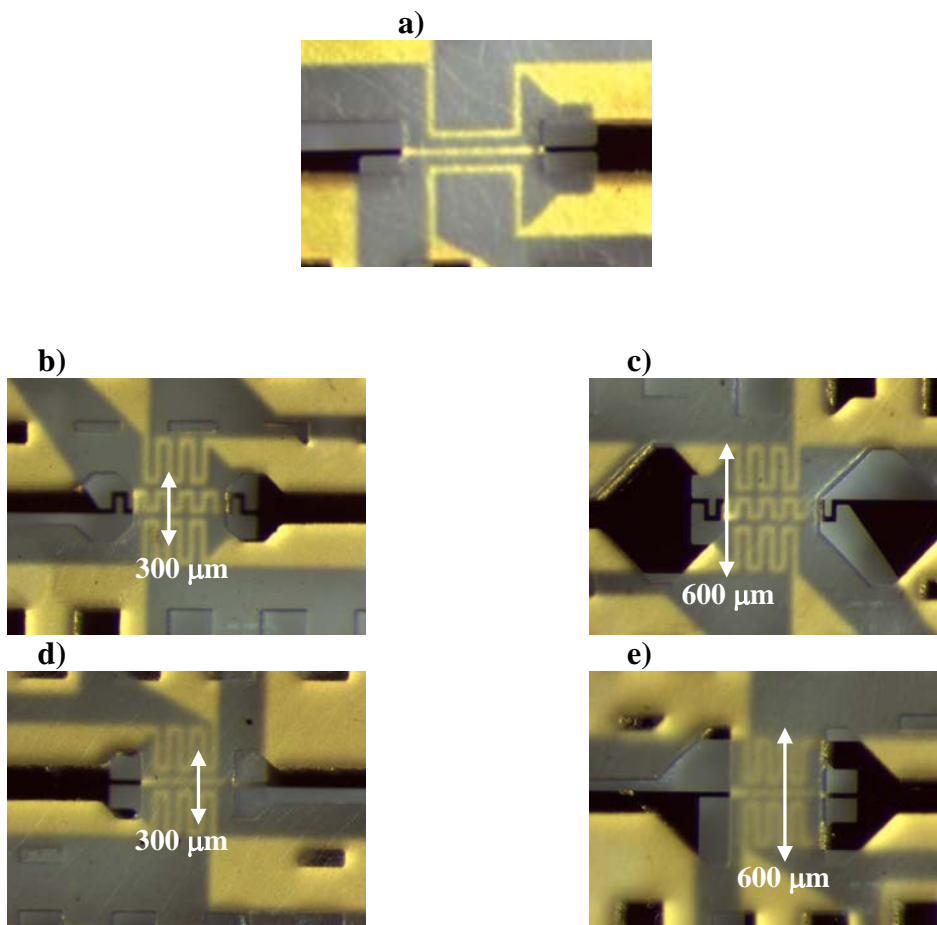

**Figure S1.** Wax valve structures. Wax barrier length is 400  $\mu\text{m}$  and channel width 150  $\mu\text{m}$  in all designs. a) Without chambers, b) small octagonal chambers, c) large octagonal chambers, d) small trapezoid chambers, e) large trapezoid chambers.

**Table S1. Heater designs for valve actuation.**

| Heater Design <sup>1,2</sup>                                                             | Opening heater |            |                             | Closing heater |           |                             |
|------------------------------------------------------------------------------------------|----------------|------------|-----------------------------|----------------|-----------|-----------------------------|
|                                                                                          | Length (μm)    | Width (μm) | Resistance <sup>3</sup> (Ω) | Length (μm)    | Width(μm) | Resistance <sup>4</sup> (Ω) |
| V1<br>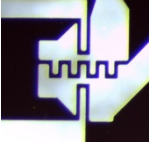   | 475            | 100        | 120±5                       | 75             | 200       | 67±8                        |
| V2<br>   | 675            | 100        | 132±9                       | 75             | 200       |                             |
| V3<br>   | 675            | 100        |                             | 175            | 200       | 75±5                        |
| V4<br>  | 675            | 100        |                             | 275            | 200       | 82±8                        |
| V5<br> | 675            | 100        |                             | 375            | 200       | 105±4                       |
| V6<br> | 875            | 100        | 154±15                      | 375            | 200       |                             |
| V7<br> | 675            | 100        | 132±9                       | 175            | 100       | 60±5                        |
| V8<br> | 675            | 25         | 114±7                       | 275            | 200       | 76±9                        |
| V9<br> | 675            | 25         |                             |                |           | 127±9                       |

<sup>1</sup>Heater tracks are 25 μm wide; <sup>2</sup>Tracks in the serpentine heaters are separated 25 μm; <sup>3</sup>Heater electrical resistance is given as average ± SD (n=10), and includes the resistance of the connection tracks. <sup>4</sup>Electrical resistance of both heaters in parallel.
